# Supplementary material
Source: HighWire-hosted journal article supplement (https://jnm.snmjournals.org/highwire/filestream/94884/field_highwire_adjunct_files/0/165829_Supplemental_Data.pdf)
Supplement: 165829_Supplemental_Data.pdf [file 165829_Supplemental_Data.pdf]

### ***Methods of Oral Glucose Tolerance Test and Laboratory measurements***

All subjects underwent a seven-point oral glucose tolerance test (OGTT) at the department of clinical diabetology in the Academic Medical Center. During the OGTT subjects ingested a standardized amount of 75 g of glucose dissolved in 300 ml water, at time point 0. Blood samples were collected at time points 0 (before the administration of the glucose), 10, 20, 30, 60, 90 and 120 minutes. Data were analysed using a glucose-insulin model to derive an OGTT-based insulin sensitivity (oral glucose insulin sensitivity [OGIS]) index to predict glucose clearance.<sup>(1)</sup> Plasma glucose levels were measured using a HemoCue Glucose 201 RT Analyzer. Plasma insulin levels were measured using sandwich enzyme immunoassay (Roche Diagnostics, Rotkreuz, Switzerland). Furthermore we assessed HbA1c (ion-exchange chromatography on a Tosoh-G8 analyser; Tosoh Bioscience, Tokyo, Japan), levels of total cholesterol, HDL-cholesterol, LDL-cholesterol, triacylglycerol (enzymatic colorimetric method for all cholesterol and triacylglycerol measurements, Roche Diagnostics) and creatinine (colorimetric). Free fatty acids were measured using spectrophotometry.

### ***Results***

The obese were significantly more insulin resistant, as measured with HOMA-IR (homeostatic model assessment – insulin resistance) and OGIS than the lean young (table 1). Measurements for insulin sensitivity did not correlate with any of the scintigraphic BAT parameters.

Supplemental Table 1. Characteristics of the male volunteers

|                                       | Obese young | IQR         | Lean young | IQR       | Lean old | IQR       |
|---------------------------------------|-------------|-------------|------------|-----------|----------|-----------|
| N                                     | 10          |             | 14         |           | 11       |           |
| Age (years)                           | 25.5        | 21.0-31.3   | 25.5       | 20.8-28.0 | 54***    | 50.0-60.0 |
| BMI (kg/m <sup>2</sup> )              | 32.2***     | 30.8-38.9   | 22.0       | 20.9-23.2 | 23.1     | 21.7-23.8 |
| Waist circumference (cm)              | 117.5***    | 110.5-144.5 | 83.0       | 82.0-85.0 | 90.0**   | 85.0-93.0 |
| Body surface area (m <sup>2</sup> )   | 2.4***      | 2.3-2.5     | 2.1        | 2.0-2.1   | 2.0      | 1.9-2.0   |
|                                       |             |             |            |           |          |           |
| <i>Laboratory values</i>              |             |             |            |           |          |           |
| HbA1c (mmol/mol)                      | 35.0        | 32.8-37.8   | 33.5       | 31.8-35.0 | 39.0***  | 36.0-40.0 |
| Creatinine (μmol/L)                   | 77.5        | 69.8-87.3   | 76.0       | 71.5-82.5 | 82.0     | 76.0-90.0 |
| Fasting plasma glucose (mmol/L)       | 3.9         | 3.7-4.4     | 4.2        | 4.0-4.6   | 4.2      | 3.7-4.5   |
| Fasting plasma insulin (pmol/L)       | 86**        | 52-132      | 27         | 15-42     | 41       | 17-52     |
| Total Cholesterol (mmol/L)            | 4.2         | 4.1-5.4     | 4.0        | 3.6-4.5   | 5.8***   | 5.2-6.0   |
| HDL Cholesterol (mmol/L)              | 1.0**       | 0.9-1.3     | 1.5        | 1.3-1.7   | 1.4      | 1.3-1.8   |
| LDL Cholesterol (mmol/L)              | 2.6         | 2.2-3.1     | 2.1        | 1.6-2.6   | 4.0***   | 2.9-4.1   |
| Cholesterol ratio                     | 4.4**       | 3.4-5.0     | 2.6        | 2.1-3.4   | 4.1*     | 3.0-4.7   |
| Triglycerides (mmol/L)                | 1.1*        | 0.8-1.7     | 0.6        | 0.5-1.1   | 0.9      | 0.8-1.1   |
| TSH (mE/L)                            | 2.4         | 1.5-3.3     | 1.8        | 1.0-2.4   | 1.7      | 1.4-2.2   |
| Free Fatty Acids (mmol/L)             | 0.6         | 0.6-0.8     | 0.5        | 0.4-0.7   | 0.5      | 0.3-0.8   |
| HOMA-IR                               | 2.4**       | 1.3-3.5     | 0.7        | 0.4-1.3   | 1.0      | 0.4-1.4   |
| OGIS (ml/min/m <sup>2</sup> )         | 440*        | 395-505     | 530        | 455-571   | 495      | 429-545   |
| Energy Expenditure in Cold (kcal/24h) | 2421        | 1499-2530   | 2294       | 1807-2666 | 1484     | 1033-2294 |

BMI, body mass index; HDL, high density lipoprotein; LDL, low density lipoprotein; TSH, thyroid stimulating hormone. HOMA-IR, homeostatic model assessment – insulin resistance, calculated as ([glucose(mmol/L) x insulin(mU/L)]/22.5). OGIS (oral glucose insulin sensitivity).

\*Data are presented as n or median [interquartile range] Significant different as compared to the lean young males \* p<0.05, \*\*p<0.01, \*\*\*p<0.001.

Supplemental Table 2. Correlations between BAT parameters and insulin sensitivity tests

|                               | SUV <sub>max</sub> | SUV <sub>mean</sub> | SQUV <sub>max</sub> | SQUV <sub>mean</sub> | BAT volume | BAT volume |
|-------------------------------|--------------------|---------------------|---------------------|----------------------|------------|------------|
| HOMA-IR                       | ρ=-0.10            | ρ=-0.11             | ρ=-0.10             | ρ=-0.15              | ρ=-0.15    | ρ=-0.07    |
| OGIS (ml/min/m <sup>2</sup> ) | ρ=-0.00            | ρ=-0.02             | ρ=-0.27             | ρ=0.01               | ρ=0.02     | ρ=0.14     |

Spearman's correlations for BAT activity parameters and HOMA-IR (homeostatic model assessment – insulin resistance, calculated as ([glucose(mmol/L) x insulin(mU/L)]/22.5) and OGIS (oral glucose insulin sensitivity). \* p<0.05, \*\*p<0.01.

## References

1. Mari A, Pacini G, Murphy E, Ludvik B, Nolan JJ. A model-based method for assessing insulin sensitivity from the oral glucose tolerance test. *Diabetes Care*. 2001;24:539-548.
